# Supplementary material
Source: PubMed Central journal article supplement (PMC2395003)
Supplement: supp_190_10_3700__1.pdf [file supp_190_10_3700__1.pdf]

Table S1. Putative *Agrobacterium pho* boxes used to generate a weight matrix in this study.

| Gene    | Distance | Score | Pho box motif       | Description                                                    |
|---------|----------|-------|---------------------|----------------------------------------------------------------|
| Atu0421 | -151     | 0.37  | TTGACATTTCCCATTTCAT | pstC, ABC transporter, membrane spanning protein               |
| Atu0420 | -117     | 0.54  | TTGTCACAAATCTTTCGT  | pstS, ABC transporter, substrate binding protein [phosphate]   |
|         | -106     | 0.36  | CTTTCGTCAAAGTGACAT  |                                                                |
| Atu0181 | -67      | 0.47  | ATGTCACACGCTTGTCAT  | phnG, hypothetical protein                                     |
| Atu0174 | -48      | 0.36  | CTGACACTCCCGCTTCAC  | phnC, ABC transporter, nucleotide binding ATPase [phosphonate] |
|         | -59      | 0.37  | TCTTCATCAAACCTGACAC |                                                                |
|         | -70      | 0.36  | ATGTAATATTTTCTTCAT  |                                                                |
| Atu6108 | -81      | 0.37  | CTGTCAGAACACCTGAT   | phnA, alkylphosphonate uptake protein                          |
| Atu0419 | -58      | 0.36  | ATGATGAATCTCTGTCAT  | phoR, two component sensor kinase                              |
|         | -47      | 0.38  | CTGTCATGAAGCTGGCCT  |                                                                |
| Atu5058 | -75      | 0.47  | CTGTCATCAAAACGTCGC  | ugpB, ABC transporter, substrate binding protein               |
|         | -29      | 0.37  | TTGCTAGACAGCCGTCAT  |                                                                |
| Atu0305 | -76      | 0.44  | GTGTAATAAATCTGACAC  | ugpA, ABC transporter, substrate binding protein               |
|         | -87      | 0.47  | CTGACACGGAACCTGCAA  |                                                                |
|         | -98      | 0.63  | CTGTCAAAGAGGCGTCAT  |                                                                |
| Atu1263 | -51      | 0.59  | ATGTCATGCCACTGTCAC  | Conserved hypothetical protein                                 |
| Atu2119 | -44      | 0.58  | CTGTCATCAAACCTGTAGC | Hypothetical protein (btaA-like)                               |
| Atu1144 | -84      | 0.46  | CTGTCACAGTTCCGTCGT  | ppk polyphosphate kinase                                       |
|         | -73      | 0.39  | CCGTCGTCAAACCTGTTAT |                                                                |
| Atu2147 | -63      | 0.39  | TTGCAATCCAACCGTCAC  | ABC transporter, substrate binding protein                     |
| Atu0202 | -66      | 0.37  | CTGGCATCCATCCGATAT  | ABC transporter, substrate binding protein (iron)              |
| Atu2014 | -46      | 0.54  | CTGTCACATACATGTTAT  | afuA2, ABC transporter, substrate binding                      |
| Atu2329 | -161     | 0.51  | CGGTCACACGCCTGTCAT  | Conserved hypothetical protein                                 |
| Atu1649 | -64      | 0.51  | CTGTCATGTTGCTGAAAC  | Conserved hypothetical protein                                 |
| Atu4642 | -133     | 0.37  | TAGTCATCTTCATGACAG  | katA, bifunctional catalase/peroxidase HPI                     |
| Atu6138 | -77      | 0.43  | TTGCAACAAAACCTGTCAC | accA, ABC transporter, substrate binding protein               |
|         | -66      | 0.76  | CTGTCACCAAACCTTTCAT |                                                                |

\*Distance : distance from the start codon

Table S2. Weight matrix used for the *pho* box analysis in this study.

|          |    |    |    |    |    |    |    |    |    |    |    |    |    |    |    |    |    |    |
|----------|----|----|----|----|----|----|----|----|----|----|----|----|----|----|----|----|----|----|
| <b>A</b> | 4  | 1  | 0  | 4  | 4  | 24 | 2  | 12 | 11 | 16 | 11 | 3  | 1  | 0  | 6  | 2  | 22 | 1  |
| <b>C</b> | 15 | 2  | 0  | 3  | 21 | 0  | 9  | 9  | 7  | 5  | 6  | 19 | 9  | 1  | 0  | 21 | 1  | 9  |
| <b>G</b> | 1  | 2  | 25 | 1  | 0  | 3  | 2  | 4  | 3  | 2  | 4  | 3  | 0  | 21 | 1  | 1  | 4  | 1  |
| <b>T</b> | 7  | 23 | 2  | 19 | 2  | 0  | 14 | 2  | 6  | 4  | 6  | 2  | 17 | 5  | 20 | 3  | 0  | 16 |

Table S3. Genes associated with putative *pho* box sequences in *Agrobacterium tumefaciens* strain C58

| gene                   |             |        |        |                                                                      |                     | pho -box            |                    |                  |                                               |                    |                    |
|------------------------|-------------|--------|--------|----------------------------------------------------------------------|---------------------|---------------------|--------------------|------------------|-----------------------------------------------|--------------------|--------------------|
| locus tag <sup>a</sup> | gene        | 5'-end | 3'-end | product                                                              | replicon            | strand <sup>b</sup> | start <sup>c</sup> | end <sup>c</sup> | putative <i>pho</i> box sequence <sup>d</sup> | score <sup>e</sup> | ln(P) <sup>f</sup> |
| Atu0052                | <i>hrpB</i> | 56078  | 53592  | helicase                                                             | chromosome-circular | D                   | -277               | -260             | TCGTCAAAAACTGACAT                             | 12.33              | -14.87             |
| Atu0058                |             | 62235  | 62492  | hypothetical protein                                                 | chromosome-circular | R                   | -157               | -140             | CTGTCAATATTCTACAC                             | 8.76               | -10.96             |
| Atu0110                | <i>polA</i> | 113127 | 116222 | DNA polymerase I                                                     | chromosome-circular | R                   | -111               | -94              | TTTTCACAAAGCCCTCGT                            | 8                  | -10.27             |
| Atu0111                |             | 116299 | 117018 | hypothetical protein                                                 | chromosome-circular | D                   | -58                | -41              | ATGTCATTGCTTTGTCTG                            | 8.29               | -10.53             |
| Atu0123                | tRNA-Ser    | 128502 | 128410 | tRNA-Ser                                                             | chromosome-circular | D                   | -104               | -87              | ATTTCAAAAACTGTCAG                             | 10.73              | -12.97             |
| Atu0124                |             | 128715 | 129041 | hypothetical protein                                                 | chromosome-circular | R                   | -126               | -109             | ATTTCAAAAACTGTCAG                             | 10.73              | -12.97             |
| Atu0174                | <i>phnC</i> | 179342 | 178482 | ABC transporter, nucleotide binding/ATPase protein [phosphonate]     | chromosome-circular | D                   | -76                | -59              | TCTTCATCAAAGTACAC                             | 10.52              | -12.75             |
| Atu0174                | <i>phnC</i> | 179342 | 178482 | ABC transporter, nucleotide binding/ATPase protein [phosphonate]     | chromosome-circular | D                   | -87                | -70              | ATGTAATATTTCTTCAT                             | 10.02              | -12.21             |
| Atu0182                |             | 185020 | 185757 | transcriptional regulator, GntR family                               | chromosome-circular | R                   | -16                | 1                | ATGTCACACGCTTGTCTG                            | 10.79              | -13.04             |
| Atu0183                | <i>dapB</i> | 186579 | 185767 | dihydrodipicolinate reductase                                        | chromosome-circular | R                   | -34                | -17              | TTTTCACTCACTTTTCAT                            | 8.93               | -11.13             |
| Atu0201                | <i>rirA</i> | 205949 | 205479 | iron-responsive transcriptional regulator                            | chromosome-circular | R                   | -93                | -76              | CTGGCATCCATCCGATAT                            | 9.55               | -11.74             |
| Atu0202                |             | 206108 | 207172 | ABC transporter, substrate binding protein [iron]                    | chromosome-circular | D                   | -83                | -66              | CTGGCATCCATCCGATAT                            | 9.55               | -11.74             |
| Atu0210                |             | 215252 | 215596 | hypothetical protein                                                 | chromosome-circular | D                   | -206               | -189             | TTGCAATAAACTGGCAC                             | 10.6               | -12.83             |
| Atu0234                |             | 235199 | 234324 | conserved hypothetical protein, membrane protein                     | chromosome-circular | R                   | -85                | -68              | ATATCAATAAACTGTTAT                            | 8.05               | -10.32             |
| Atu0235                |             | 235316 | 236704 | transcriptional regulator, GntR family                               | chromosome-circular | D                   | -49                | -32              | ATATCAATAAACTGTTAT                            | 8.05               | -10.32             |
| Atu0237                |             | 237647 | 237189 | hypothetical protein                                                 | chromosome-circular | D                   | -71                | -54              | TAGTCACGCAACTTATAT                            | 8.35               | -10.58             |
| Atu0238                |             | 237802 | 238695 | oxidoreductase                                                       | chromosome-circular | R                   | -101               | -84              | TAGTCACGCAACTTATAT                            | 8.35               | -10.58             |
| Atu0237                |             | 237647 | 237189 | hypothetical protein                                                 | chromosome-circular | D                   | -112               | -95              | TTTTCATGAACTTATAT                             | 10.94              | -13.2              |
| Atu0238                |             | 237802 | 238695 | oxidoreductase                                                       | chromosome-circular | R                   | -60                | -43              | TTTTCATGAACTTATAT                             | 10.94              | -13.2              |
| Atu0288                |             | 283478 | 282201 | hypothetical protein                                                 | chromosome-circular | D                   | -79                | -62              | TTGACACAAGTTTGTGAT                            | 8.24               | -10.48             |
| Atu0300                |             | 293562 | 292969 | methyltransferase                                                    | chromosome-circular | R                   | -42                | -25              | TTGTCAAAAATTGTTAC                             | 12.02              | -14.47             |
| Atu0305                | <i>ugpA</i> | 297124 | 298422 | ABC transporter, substrate binding protein [sn-glycerol 3-phosphate] | chromosome-circular | D                   | -93                | -76              | GTGTAATAAATCTGACAC                            | 12.03              | -14.49             |
| Atu0305                | <i>ugpA</i> | 297124 | 298422 | ABC transporter, substrate binding protein [sn-glycerol 3-phosphate] | chromosome-circular | D                   | -71                | -54              | CTGTCAAAGAGCGTCAT                             | 10.8               | -13.05             |
| Atu0305                | <i>ugpA</i> | 297124 | 298422 | ABC transporter, substrate binding protein [sn-glycerol 3-phosphate] | chromosome-circular | D                   | -82                | -65              | CTGACACGGAAGTGTCAA                            | 10.42              | -12.63             |
| Atu0344                |             | 335816 | 336697 | hypothetical protein                                                 | chromosome-circular | D                   | -68                | -51              | TTGTCATATTCTGTGCG                             | 10.61              | -12.84             |
| Atu0344                |             | 335816 | 336697 | hypothetical protein                                                 | chromosome-circular | R                   | -48                | -31              | CTGTCATAAATCACTAAT                            | 10.53              | -12.76             |
| Atu0350                |             | 346223 | 345888 | hypothetical protein                                                 | chromosome-circular | D                   | -74                | -57              | CTGACATGATAATTACAT                            | 10.55              | -12.78             |
| Atu0351                |             | 346382 | 346945 | hypothetical protein                                                 | chromosome-circular | R                   | -102               | -85              | CTGACATGATAATTACAT                            | 10.55              | -12.78             |
| Atu0391                |             | 384107 | 385138 | ABC transporter, nucleotide binding/ATPase protein                   | chromosome-circular | D                   | -192               | -175             | GTGTCATAGAAGTTTCCC                            | 9.14               | -11.33             |
| Atu0396                |             | 389380 | 390876 | coenzyme A transferase                                               | chromosome-circular | R                   | -33                | -16              | CTGTCATCAGATGGCAC                             | 9.38               | -11.56             |
| Atu0418                |             | 414581 | 413700 | hypothetical protein                                                 | chromosome-circular | R                   | -185               | -168             | CTGTCATGAAGCTGGCCT                            | 9.24               | -11.43             |
| Atu0419                | <i>phoR</i> | 414813 | 416081 | two component sensor kinase                                          | chromosome-circular | D                   | -64                | -47              | CTGTCATGAAGCTGGCCT                            | 9.24               | -11.43             |
| Atu0420                |             | 416277 | 417311 | ABC transporter, substrate binding protein [phosphate]               | chromosome-circular | D                   | -134               | -117             | TTGTCACAAATCTTTCGT                            | 13.63              | -16.63             |
| Atu0420                |             | 416277 | 417311 | ABC transporter, substrate binding protein [phosphate]               | chromosome-circular | D                   | -123               | -106             | CTTTCGTCAAAGTACAT                             | 10.39              | -12.6              |
| Atu0421                | <i>pstC</i> | 417570 | 419084 | ABC transporter, membrane spanning protein                           | chromosome-circular | D                   | -168               | -151             | TTGACATTTCCCATTCAT                            | 8.1                | -10.36             |
| Atu0438                | <i>intD</i> | 434858 | 433830 | phage-related integrase                                              | chromosome-circular | R                   | -294               | -277             | CTGAAATCAGGCCGACAT                            | 9.11               | -11.3              |
| Atu0597                |             | 582974 | 581613 | hypothetical protein                                                 | chromosome-circular | D                   | -87                | -70              | TTGTCATGCGGCTGTGAT                            | 9.3                | -11.48             |
| Atu0602                | <i>glnA</i> | 590152 | 588758 | glutamine synthetase                                                 | chromosome-circular | D                   | -97                | -80              | TTGTCAAACTACGGTTAT                            | 8.1                | -10.36             |
| Atu0603                |             | 590321 | 591505 | hypothetical protein                                                 | chromosome-circular | R                   | -89                | -72              | TTGTCAAACTACGGTTAT                            | 8.1                | -10.36             |
| Atu0607                | <i>aceA</i> | 594585 | 593281 | isocitrate lyase                                                     | chromosome-circular | D                   | -204               | -187             | CTGTTACAAACTCGTCAG                            | 9.06               | -11.25             |
| Atu0608                |             | 594821 | 596236 | transcriptional regulator                                            | chromosome-circular | R                   | -49                | -32              | CTGTTACAAACTCGTCAG                            | 9.06               | -11.25             |

|         |              |         |         |                                                                                     |                     |   |      |      |                     |       |        |
|---------|--------------|---------|---------|-------------------------------------------------------------------------------------|---------------------|---|------|------|---------------------|-------|--------|
| Atu0607 | <i>aceA</i>  | 594585  | 593281  | isocitrate lyase                                                                    | chromosome-circular | D | -145 | -128 | CTGTCACGCACCCTACAG  | 8.22  | -10.47 |
| Atu0608 |              | 594821  | 596236  | transcriptional regulator                                                           | chromosome-circular | R | -108 | -91  |                     | 8.22  | -10.47 |
| Atu0668 |              | 665046  | 664387  | hypothetical protein                                                                | chromosome-circular | D | -65  | -48  | CTGTCATTCAACTGTTAT  | 14.41 | -17.83 |
| Atu0683 | <i>groES</i> | 678332  | 678036  | co-chaperonin GroES                                                                 | chromosome-circular | R | -146 | -129 |                     | 8.3   | -10.54 |
| Atu0684 |              | 678585  | 679550  | hypothetical protein                                                                | chromosome-circular | D | -124 | -107 | CTGCCGGAAAAATTTCCAC | 8.3   | -10.54 |
| Atu0731 |              | 730944  | 729949  | divalent cation transporter                                                         | chromosome-circular | D | -111 | -94  |                     | 16.23 | -21.15 |
| Atu0732 | <i>mmgC</i>  | 731154  | 732938  | acyl-CoA dehydrogenase                                                              | chromosome-circular | R | -116 | -99  | TTGTTATAAAACTGTCAT  | 16.23 | -21.15 |
| Atu0754 | <i>aroC</i>  | 752724  | 751627  | chorismate synthase                                                                 | chromosome-circular | D | -234 | -217 |                     | 8.03  | -10.29 |
| Atu0755 |              | 753120  | 753422  | hypothetical protein                                                                | chromosome-circular | R | -179 | -162 | CTTTTACAATTCGTCAC   | 8.03  | -10.29 |
| Atu0802 |              | 801242  | 800271  | hypothetical protein                                                                | chromosome-circular | D | -203 | -186 |                     | 9.59  | -11.77 |
| Atu0803 | <i>ppdK</i>  | 801469  | 804195  | pyruvate phosphate dikinase                                                         | chromosome-circular | R | -41  | -24  | TTGTCATTTTCTATCAT   | 9.59  | -11.77 |
| Atu0826 |              | 825843  | 824032  | hypothetical protein                                                                | chromosome-circular | D | -137 | -120 | CCGTTACAAAACCTTCAT  | 11.01 | -13.29 |
| Atu0837 |              | 836752  | 836237  | transcriptional regulator, MarR family                                              | chromosome-circular | R | -74  | -57  |                     | 8.33  | -10.57 |
| Atu0838 |              | 836900  | 838423  | MFS permease                                                                        | chromosome-circular | D | -91  | -74  | ATGTCAAAAACTTGCCAT  | 8.33  | -10.57 |
| Atu0837 |              | 836752  | 836237  | transcriptional regulator, MarR family                                              | chromosome-circular | D | -91  | -74  |                     | 9.82  | -12.01 |
| Atu0838 |              | 836900  | 838423  | MFS permease                                                                        | chromosome-circular | R | -74  | -57  | TTGGCATATATATGTCAA  | 9.82  | -12.01 |
| Atu0851 |              | 852876  | 852454  | hypothetical protein                                                                | chromosome-circular | D | -64  | -47  | ATGTCATCCGGCCGTGCGC | 8.3   | -10.54 |
| Atu0878 |              | 875145  | 874405  | hypothetical protein                                                                | chromosome-circular | R | -41  | -24  |                     | 8.52  | -10.74 |
| Atu0879 | <i>rhtB</i>  | 875271  | 875915  | RhtB family transporter                                                             | chromosome-circular | D | -102 | -85  | CTGACACAACGTTGTCAG  | 8.52  | -10.74 |
| Atu0916 | <i>ros</i>   | 905207  | 905635  | transcriptional regulator                                                           | chromosome-circular | R | -106 | -89  | TTGAAACCAACGTGAAAT  | 8.06  | -10.32 |
| Atu0921 |              | 908753  | 910285  | two component sensor kinase                                                         | chromosome-circular | D | -180 | -163 | CCGTCGCTTACCGTCAT   | 8.2   | -10.45 |
| Atu0924 |              | 913336  | 913530  | hypothetical protein                                                                | chromosome-circular | R | -86  | -69  | ATGTCATCACCATCACAT  | 9.01  | -11.2  |
| Atu0988 |              | 984418  | 982991  | molecular chaperone, Hsp70 family                                                   | chromosome-circular | R | -213 | -196 |                     | 8.76  | -10.97 |
| Atu0989 |              | 984701  | 985678  | hypothetical protein                                                                | chromosome-circular | D | -87  | -70  | GTGAAATAAATTTTTAT   | 8.76  | -10.97 |
| Atu0991 |              | 986670  | 987590  | cation efflux system component                                                      | chromosome-circular | D | -16  | 1    | AGGTCAAATACACGTCAT  | 8.42  | -10.65 |
| Atu1021 |              | 1013849 | 1014946 | outer membrane protein                                                              | chromosome-circular | D | -135 | -118 | CTGCTTCCCTTTGTGCAT  | 8.43  | -10.66 |
| Atu1084 | <i>dnaC</i>  | 1076077 | 1074581 | replicative DNA helicase                                                            | chromosome-circular | D | -249 | -232 |                     | 9.21  | -11.4  |
| Atu1085 | <i>slyA</i>  | 1076390 | 1076845 | transcriptional regulator, MarR family                                              | chromosome-circular | R | -81  | -64  | TTTTCAAGTTTCTTTCAT  | 9.21  | -11.4  |
| Atu1105 |              | 1094532 | 1093585 | hypothetical protein                                                                | chromosome-circular | D | -178 | -161 | CTTTCAACAACCGACAC   | 10.7  | -12.95 |
| Atu1144 | <i>ppk</i>   | 1132881 | 1135079 | polyphosphate kinase                                                                | chromosome-circular | D | -90  | -73  | CCGTCGTCAAAGTGTAT   | 11.16 | -13.46 |
| Atu1144 | <i>ppk</i>   | 1132881 | 1135079 | polyphosphate kinase                                                                | chromosome-circular | D | -101 | -84  | CTGTCACAGTCCGTCGT   | 10.98 | -13.25 |
| Atu1148 |              | 1139873 | 1138515 | hypothetical protein                                                                | chromosome-circular | D | -97  | -80  | ATTTTCATCAAAGCTTCAA | 8.45  | -10.68 |
| Atu1210 | <i>cpdB</i>  | 1205624 | 1203636 | 2',3'-cyclic nucleotide 2'-phosphodiesterase/3'-nucleotidase bifunctional periplasi | chromosome-circular | D | -96  | -79  | CTGTCACGGCTTGTGCAT  | 9.44  | -11.62 |
| Atu1211 |              | 1205775 | 1206200 | hypothetical protein                                                                | chromosome-circular | R | -72  | -55  |                     | 9.44  | -11.62 |
| Atu1210 | <i>cpdB</i>  | 1205624 | 1203636 | 2',3'-cyclic nucleotide 2'-phosphodiesterase/3'-nucleotidase bifunctional periplasi | chromosome-circular | R | -44  | -27  | CTGTCAGGAAAACGACAG  | 8.25  | -10.49 |
| Atu1211 |              | 1205775 | 1206200 | hypothetical protein                                                                | chromosome-circular | D | -124 | -107 |                     | 8.25  | -10.49 |
| Atu1221 |              | 1214752 | 1215195 | hypothetical protein                                                                | chromosome-circular | D | -54  | -37  | TTGTCGCTAAATTGTCAC  | 10.43 | -12.65 |
| Atu1226 | <i>exoD</i>  | 1218204 | 1217560 | exoD protein                                                                        | chromosome-circular | R | -206 | -189 | ATGTAACGAAGCTTACAT  | 10.51 | -12.74 |
| Atu1254 |              | 1242255 | 1241941 | transcriptional regulator, ArsR family                                              | chromosome-circular | R | -55  | -38  |                     | 10.78 | -13.02 |
| Atu1255 |              | 1242358 | 1243116 | oxidoreductase                                                                      | chromosome-circular | D | -65  | -48  | TTTTAATAAAAACCGAAAT | 10.78 | -13.02 |
| Atu1263 |              | 1252117 | 1254315 | hypothetical protein                                                                | chromosome-circular | D | -68  | -51  | ATGTCATGCCACTGTCAC  | 12.79 | -15.47 |
| Atu1348 |              | 1344362 | 1337895 | hypothetical protein                                                                | chromosome-circular | D | -177 | -160 |                     | 10.19 | -12.39 |
| Atu1349 |              | 1344719 | 1345087 | hypothetical protein                                                                | chromosome-circular | R | -197 | -180 | CTGTTAAAAAGCCGACAC  | 10.19 | -12.39 |
| Atu1349 |              | 1344719 | 1345087 | hypothetical protein                                                                | chromosome-circular | R | -50  | -33  | ATGTCACATATGTGTCGT  | 11.73 | -14.13 |
| Atu1349 |              | 1344719 | 1345087 | hypothetical protein                                                                | chromosome-circular | D | -50  | -33  | ACGACACATATGTGACAT  | 8.36  | -10.6  |

|         |             |         |         |                                                              |                     |   |      |      |                     |       |        |
|---------|-------------|---------|---------|--------------------------------------------------------------|---------------------|---|------|------|---------------------|-------|--------|
| Atu1372 |             | 1366762 | 1366292 | hypothetical protein                                         | chromosome-circular | R | -32  | -15  | TTGTTGTAATCCTTCAA   | 8.61  | -10.83 |
| Atu1373 |             | 1366879 | 1367721 | hypothetical protein                                         | chromosome-circular | D | -102 | -85  |                     | 8.61  | -10.83 |
| Atu1375 | <i>tsf</i>  | 1369042 | 1369968 | elongation factor Ts                                         | chromosome-circular | D | -193 | -176 | TCTTCATAACGCTGTCAC  | 9.5   | -11.68 |
| Atu1492 |             | 1481481 | 1481128 | transcriptional regulator, ArsR family                       | chromosome-circular | D | -107 | -90  | TTGATATATAGATGTTAT  | 9.88  | -12.06 |
| Atu1526 | <i>gnd</i>  | 1518951 | 1517521 | 6-phosphogluconate dehydrogenase                             | chromosome-circular | D | -100 | -83  | GCGTCATCAAAATTTAAT  | 8.32  | -10.56 |
| Atu1555 | tRNA-Leu    | 1543361 | 1543274 | tRNA-Leu                                                     | chromosome-circular | D | -90  | -73  |                     | 12.7  | -15.34 |
| Atu1556 | <i>lipB</i> | 1543582 | 1544283 | lipoyltransferase                                            | chromosome-circular | R | -148 | -131 | ATTTCAAAAACTGTAC    | 12.7  | -15.34 |
| Atu1615 |             | 1599366 | 1597438 | hypothetical protein                                         | chromosome-circular | R | -258 | -241 |                     | 8.58  | -10.8  |
| Atu1616 | <i>fumC</i> | 1599703 | 1601196 | fumarate hydratase                                           | chromosome-circular | D | -96  | -79  | CCGTAGTAAAAATGACAC  | 8.58  | -10.8  |
| Atu1615 |             | 1599366 | 1597438 | hypothetical protein                                         | chromosome-circular | R | -131 | -114 |                     | 8.15  | -10.41 |
| Atu1616 | <i>fumC</i> | 1599703 | 1601196 | fumarate hydratase                                           | chromosome-circular | D | -223 | -206 | AAGCCATAAAAACGTAAT  | 8.15  | -10.41 |
| Atu1621 |             | 1606678 | 1605797 | hypothetical protein                                         | chromosome-circular | R | -96  | -79  |                     | 8.85  | -11.05 |
| Atu1622 | <i>gyrB</i> | 1606898 | 1609036 | DNA topoisomerase IV subunit B                               | chromosome-circular | D | -141 | -124 | CTGACACAATCGTGCCAT  | 8.85  | -11.05 |
| Atu1649 |             | 1633804 | 1632974 | hypothetical protein                                         | chromosome-circular | D | -81  | -64  | CTGTCATGTTGCTGAAAC  | 9.69  | -11.87 |
| Atu1657 | <i>nadE</i> | 1643233 | 1641554 | NAD(+) synthase                                              | chromosome-circular | D | -165 | -148 |                     | 15.1  | -18.98 |
| Atu1658 |             | 1643603 | 1645396 | hypothetical protein                                         | chromosome-circular | R | -222 | -205 | TTGTCATGTAAGTGTAC   | 15.1  | -18.98 |
| Atu1657 | <i>nadE</i> | 1643233 | 1641554 | NAD(+) synthase                                              | chromosome-circular | D | -176 | -159 |                     | 9.85  | -12.04 |
| Atu1658 |             | 1643603 | 1645396 | hypothetical protein                                         | chromosome-circular | R | -211 | -194 | ACGTCGCAAAATTTGCAT  | 9.85  | -12.04 |
| Atu1678 | <i>queA</i> | 1666685 | 1665585 | S-adenosylmethionine:tRNA ribosyltransferase-isomerase       | chromosome-circular | R | -203 | -186 | TTGTCACCAATGTGAAAC  | 10.23 | -12.43 |
| Atu1706 | <i>tata</i> | 1691454 | 1691242 | twin arginine translocase protein A                          | chromosome-circular | D | -49  | -32  | CTTTCAAACGTCTTACAT  | 8.58  | -10.79 |
| Atu1716 |             | 1703406 | 1703089 | hypothetical protein                                         | chromosome-circular | R | -162 | -145 | TCGTCACAAAACCTTCGG  | 8.57  | -10.79 |
| Atu1744 |             | 1731200 | 1730613 | nitroreductase family protein                                | chromosome-circular | R | -22  | -5   |                     | 8.98  | -11.18 |
| Atu1745 |             | 1731304 | 1732284 | hypothetical protein                                         | chromosome-circular | D | -99  | -82  | CTTCCATTCTGCTGTCAT  | 8.98  | -11.18 |
| Atu1767 |             | 1750785 | 1751825 | transcriptional regulator, AraC family                       | chromosome-circular | D | -145 | -128 | TTGTCGCAAAATTTGCAT  | 8.95  | -11.15 |
| Atu1777 |             | 1762007 | 1761663 | hypothetical protein                                         | chromosome-circular | D | -106 | -89  | ATGTAACGAAACGGACAT  | 8.43  | -10.66 |
| Atu1819 |             | 1799121 | 1798732 | hypothetical protein                                         | chromosome-circular | R | -109 | -92  | CTGTCAAAATCGCGTCAG  | 8.53  | -10.75 |
| Atu1835 |             | 1818555 | 1818749 | hypothetical protein                                         | chromosome-circular | R | -195 | -178 | CTGATATATATTCGAAAT  | 8.05  | -10.31 |
| Atu1855 |             | 1834617 | 1835825 | MFS permease                                                 | chromosome-circular | D | -44  | -27  | CTGTGACAGAACTTTCAC  | 9.76  | -11.95 |
| Atu1882 | <i>usg</i>  | 1862640 | 1862888 | usg protein                                                  | chromosome-circular | R | -134 | -117 | CCGTCACAAATTTGTTAT  | 11.05 | -13.33 |
| Atu1908 |             | 1886142 | 1885321 | hypothetical protein                                         | chromosome-circular | R | -39  | -22  | TTGTCACAAACATGTGAC  | 11.14 | -13.43 |
| Atu2014 |             | 1976961 | 1975978 | ABC transporter, substrate binding protein                   | chromosome-circular | D | -63  | -46  | CTGTCACATACATGTTAT  | 13.16 | -15.97 |
| Atu2049 |             | 2007140 | 2007475 | tmRNA                                                        | chromosome-circular | D | -60  | -43  | TTTTTCATGGAATTTGCAT | 11.22 | -13.52 |
| Atu2072 | <i>prmA</i> | 2033770 | 2033045 | ribosomal protein L11 methyltransferase                      | chromosome-circular | R | -210 | -193 | TTGCCACAAAACCTTCAT  | 13.08 | -15.86 |
| Atu2073 | <i>sco1</i> | 2034611 | 2034003 | sco1 protein homolog                                         | chromosome-circular | R | -130 | -113 | TTGTCACAAAGCCGCAAT  | 8.4   | -10.64 |
| Atu2078 |             | 2037904 | 2037002 | transcriptional regulator, LysR family                       | chromosome-circular | D | -149 | -132 |                     | 10.1  | -12.29 |
| Atu2079 |             | 2038103 | 2039032 | ABC transporter, membrane spanning protein                   | chromosome-circular | R | -67  | -50  | CTGCCATCCACCCGATAT  | 10.1  | -12.29 |
| Atu2085 | <i>lpxC</i> | 2046758 | 2045802 | UDP-3-O-[3-hydroxymyristoyl] N-acetylglucosamine deacetylase | chromosome-circular | D | -137 | -120 | TTGTCGTGACACCTTCAT  | 10.7  | -12.95 |
| Atu2114 | <i>djlA</i> | 2078748 | 2077996 | molecular chaperone, DnaJ family                             | chromosome-circular | D | -83  | -66  |                     | 9.47  | -11.66 |
| Atu2115 | <i>pfp</i>  | 2078840 | 2080279 | diphosphate--fructose-6-phosphate 1-phosphotransferase       | chromosome-circular | R | -26  | -9   | CTGAAGCAAAACTGTCCG  | 9.47  | -11.66 |
| Atu2121 | <i>lyc</i>  | 2084652 | 2085503 | glycosyl hydrolase/lysozyme                                  | chromosome-circular | R | -22  | -5   | TGGTAACAAACTGATAT   | 8.38  | -10.61 |
| Atu2146 |             | 2111487 | 2111299 | hypothetical protein                                         | chromosome-circular | R | -21  | -4   |                     | 11.22 | -13.53 |
| Atu2147 |             | 2111571 | 2112677 | ABC transporter, substrate binding protein                   | chromosome-circular | D | -80  | -63  | TTGCAATCCAACCGTCAC  | 11.22 | -13.53 |
| Atu2146 |             | 2111487 | 2111299 | hypothetical protein                                         | chromosome-circular | R | -32  | -15  |                     | 9.17  | -11.35 |
| Atu2147 |             | 2111571 | 2112677 | ABC transporter, substrate binding protein                   | chromosome-circular | D | -69  | -52  | CCGTCACATTAGCTTCAT  | 9.17  | -11.35 |
| Atu2155 | <i>metH</i> | 2123789 | 2120016 | methionine synthase                                          | chromosome-circular | D | -133 | -116 | CTGTCAGCGATATTTCTG  | 8.88  | -11.08 |

|         |             |         |         |                                                            |                     |   |      |      |                     |       |        |
|---------|-------------|---------|---------|------------------------------------------------------------|---------------------|---|------|------|---------------------|-------|--------|
| Atu2156 |             | 2123981 | 2125228 | hypothetical protein                                       | chromosome-circular | R | -76  | -59  | CTGTACGCATATTTCG    | 8.88  | -11.08 |
| Atu2157 |             | 2125980 | 2125420 | tyrosine/serine protein phosphatase                        | chromosome-circular | R | -179 | -162 | TTTTCAAATCCCGTGAT   | 8.05  | -10.31 |
| Atu2201 |             | 2174776 | 2174132 | hydrolase                                                  | chromosome-circular | D | -81  | -64  | CTGGCATCTTTCCGTCGC  | 8.11  | -10.37 |
| Atu2202 |             | 2174913 | 2174981 | hypothetical protein                                       | chromosome-circular | R | -73  | -56  | CTGGCATCTTTCCGTCGC  | 8.11  | -10.37 |
| Atu2218 | <i>prsA</i> | 2186242 | 2187174 | ribose-phosphate pyrophosphokinase                         | chromosome-circular | D | -205 | -188 | AAGTCATAGAGATTTTCAC | 8.25  | -10.49 |
| Atu2222 |             | 2190893 | 2190054 | dolichol-phosphate mannosyltransferase                     | chromosome-circular | D | -56  | -39  | CCGTAATAAAACTGCAAT  | 8.03  | -10.3  |
| Atu2223 | <i>mcpA</i> | 2191092 | 2193356 | methyl-accepting chemotaxis protein                        | chromosome-circular | R | -160 | -143 | CCGTAATAAAACTGCAAT  | 8.03  | -10.3  |
| Atu2241 |             | 2213654 | 2211771 | ABC transporter, nucleotide binding/ATPase protein         | chromosome-circular | D | -89  | -72  | CTTTCATTTTCCTGACGT  | 8.54  | -10.76 |
| Atu2297 |             | 2272088 | 2273137 | glycosyltransferase                                        | chromosome-circular | D | -93  | -76  | CTGACATGATCCTGTAAC  | 10.32 | -12.53 |
| Atu2329 |             | 2304306 | 2303599 | hypothetical protein                                       | chromosome-circular | D | -85  | -68  | ACGTCGTTAATCTGTCAC  | 9.18  | -11.37 |
| Atu2435 |             | 2405882 | 2406397 | acetyltransferase                                          | chromosome-circular | D | -70  | -53  | CTTTCCTATACCTGTCAC  | 9.08  | -11.27 |
| Atu2489 |             | 2458677 | 2457859 | hypothetical protein                                       | chromosome-circular | D | -153 | -136 | TTTTCAATTGGCTGTCAT  | 8.17  | -10.42 |
| Atu2491 |             | 2460309 | 2459926 | hypothetical protein                                       | chromosome-circular | R | -40  | -23  | CTGTCACTCTGATGTCAC  | 10.01 | -12.2  |
| Atu2492 | <i>mtbA</i> | 2460472 | 2462316 | MFS permease [sugar]                                       | chromosome-circular | D | -140 | -123 | CTGTCACTCTGATGTCAC  | 10.01 | -12.2  |
| Atu2502 | <i>hemO</i> | 2470987 | 2470376 | heme oxygenase                                             | chromosome-circular | R | -285 | -268 | ATGCCATCAATCCGTTGT  | 9.57  | -11.75 |
| Atu2503 | <i>dapA</i> | 2471294 | 2472178 | dihydrodipicolinate synthase                               | chromosome-circular | D | -39  | -22  | ATGCCATCAATCCGTTGT  | 9.57  | -11.75 |
| Atu2525 |             | 2499620 | 2498271 | MFS permease                                               | chromosome-circular | D | -133 | -116 | CTTCTATCAATATTTTCAT | 8.71  | -10.92 |
| Atu2541 |             | 2512997 | 2512788 | hypothetical protein                                       | chromosome-circular | R | -205 | -188 | CTGTCAATATTCCTACAC  | 8.76  | -10.96 |
| Atu2548 | <i>hemH</i> | 2519121 | 2520071 | phosphoribosylaminoimidazole-succinocarboxamide synthase   | chromosome-circular | D | -196 | -179 | TCGTCAAAAACTGACAT   | 12.33 | -14.87 |
| Atu2577 |             | 2549950 | 2552667 | ABC transporter, nucleotide binding/ATPase protein         | chromosome-circular | D | -18  | -1   | AGGTCATAGAAGTTTTAT  | 8.38  | -10.61 |
| Atu2579 |             | 2553340 | 2554218 | metal dependant beta lactamase protein                     | chromosome-circular | D | -118 | -101 | TTGCAATATAAATGAAAT  | 9.68  | -11.87 |
| Atu2626 |             | 2609704 | 2609372 | hypothetical protein                                       | chromosome-circular | D | -108 | -91  | CTGTGCGTACCCTGTCAT  | 10.33 | -12.54 |
| Atu2702 |             | 2686375 | 2685629 | hypothetical protein                                       | chromosome-circular | R | -89  | -72  | TTGATAAAATATTGTCAC  | 8.77  | -10.98 |
| Atu2703 | <i>rplS</i> | 2686644 | 2687183 | 50S ribosomal protein L19                                  | chromosome-circular | D | -197 | -180 | TTGATAAAATATTGTCAC  | 8.77  | -10.98 |
| Atu2741 |             | 2737992 | 2739152 | hypothetical protein                                       | chromosome-circular | R | -76  | -59  | CTGACAACCTAATCTCAT  | 8.01  | -10.28 |
| Atu2757 | <i>glnK</i> | 2757161 | 2757511 | nitrogen regulatory protein PII                            | chromosome-circular | D | -139 | -122 | CCGTCATATAATCTTTAT  | 9.86  | -12.04 |
| Atu2757 | <i>glnK</i> | 2757161 | 2757511 | nitrogen regulatory protein PII                            | chromosome-circular | D | -150 | -133 | TTTTCAGACGCCCGTCAT  | 8.64  | -10.85 |
| Atu2785 | <i>rplU</i> | 2789144 | 2788830 | 50S ribosomal protein L21                                  | chromosome-circular | R | -238 | -221 | TTGAAAAGTAACTGTAAC  | 8.63  | -10.84 |
| Atu2786 |             | 2789477 | 2789917 | hypothetical protein                                       | chromosome-circular | D | -112 | -95  | TTGAAAAGTAACTGTAAC  | 8.63  | -10.84 |
| Atu2788 | <i>citE</i> | 2791022 | 2790138 | citrate lyase, beta subunit                                | chromosome-circular | D | -56  | -39  | ATGTCACAAAAGCTTGAC  | 9.18  | -11.37 |
| Atu2789 |             | 2791160 | 2791390 | hypothetical protein                                       | chromosome-circular | R | -99  | -82  | ATGTCACAAAAGCTTGAC  | 9.18  | -11.37 |
| Atu2806 |             | 2809754 | 2809335 | hypothetical protein                                       | chromosome-circular | R | -181 | -164 | CTATCAACACCCTGTCAC  | 8     | -10.27 |
| Atu2826 | <i>hpx</i>  | 2832148 | 2831183 | heat shock protein HtpX                                    | chromosome-circular | R | -104 | -87  | ATTTCATATCCCGTCAT   | 8.59  | -10.81 |
| Atu2827 |             | 2832265 | 2832477 | hypothetical protein                                       | chromosome-circular | D | -30  | -13  | ATTTCATATCCCGTCAT   | 8.59  | -10.81 |
| Atu3105 |             | 114149  | 113220  | hypothetical protein                                       | chromosome-linear   | R | -90  | -73  | TTGTCATAAAGCCGTAGC  | 10.84 | -13.1  |
| Atu3114 |             | 124940  | 123651  | ABC transporter, substrate binding protein [sugar]         | chromosome-linear   | D | -78  | -61  | ATGTAACCAATTAGTTAT  | 8.32  | -10.56 |
| Atu3115 |             | 125058  | 125756  | transcriptional regulator, TetR family                     | chromosome-linear   | R | -57  | -40  | ATGTAACCAATTAGTTAT  | 8.32  | -10.56 |
| Atu3180 |             | 190735  | 189902  | ABC transporter, nucleotide binding/ATPase protein         | chromosome-linear   | R | -190 | -173 | ATGTCGCACATATGTAAT  | 9.65  | -11.83 |
| Atu3181 |             | 191036  | 192238  | hypothetical protein                                       | chromosome-linear   | D | -128 | -111 | ATGTCGCACATATGTAAT  | 9.65  | -11.83 |
| Atu3191 |             | 201234  | 200548  | outer membrane protein                                     | chromosome-linear   | D | -200 | -183 | TTGTTGCGCAATTGTCAC  | 8     | -10.27 |
| Atu3297 | <i>dctB</i> | 324887  | 323046  | two component sensor kinase for C4-dicarboxylate transport | chromosome-linear   | R | -98  | -81  | CTTCAATAAAAACTACAT  | 8.43  | -10.65 |
| Atu3298 | <i>dctA</i> | 325124  | 326470  | C4-dicarboxylate transport protein                         | chromosome-linear   | D | -156 | -139 | CTTCAATAAAAACTACAT  | 8.43  | -10.65 |
| Atu3312 |             | 343954  | 343097  | hypothetical protein                                       | chromosome-linear   | R | -110 | -93  | TTGTTATCTGCATGACAC  | 8.09  | -10.35 |
| Atu3318 |             | 350134  | 349337  | transcriptional regulator, LuxR family                     | chromosome-linear   | R | -88  | -71  | ATGTCAACTATCATTAAAT | 8.3   | -10.54 |
| Atu3319 |             | 350330  | 350623  | hypothetical protein                                       | chromosome-linear   | D | -125 | -108 | ATGTCAACTATCATTAAAT | 8.3   | -10.54 |

|         |             |         |         |                                                                  |                   |   |      |      |                     |       |        |
|---------|-------------|---------|---------|------------------------------------------------------------------|-------------------|---|------|------|---------------------|-------|--------|
| Atu3334 |             | 369564  | 369331  | hypothetical protein                                             | chromosome-linear | D | -155 | -138 | ATGTCATGCAACTTTCCA  | 8.43  | -10.65 |
| Atu3335 |             | 369811  | 370392  | 3-methyladenine DNA glycosylase                                  | chromosome-linear | R | -109 | -92  |                     | 8.43  | -10.65 |
| Atu3353 | <i>manC</i> | 388556  | 387126  | mannose-1-phosphate guanylyltransferase (GDP)                    | chromosome-linear | D | -133 | -116 | CATTCACCAAGCTTTCCAC | 8.61  | -10.83 |
| Atu3363 |             | 403148  | 401412  | sensory methylation accepting chemotaxis protein                 | chromosome-linear | R | -271 | -254 | CTTTCATCCAAACGGCAT  | 9.34  | -11.52 |
| Atu3364 |             | 403463  | 404716  | D-amino acid dehydrogenase                                       | chromosome-linear | D | -61  | -44  |                     | 9.34  | -11.52 |
| Atu3363 |             | 403148  | 401412  | sensory methylation accepting chemotaxis protein                 | chromosome-linear | R | -228 | -211 | TTGCCACAGTGCTGATAT  | 8.09  | -10.35 |
| Atu3364 |             | 403463  | 404716  | D-amino acid dehydrogenase                                       | chromosome-linear | D | -104 | -87  |                     | 8.09  | -10.35 |
| Atu3515 |             | 563428  | 563114  | hypothetical protein                                             | chromosome-linear | R | -135 | -118 | TTTTCACGAAGCTGTGAC  | 8.66  | -10.87 |
| Atu3565 |             | 619497  | 618517  | hypothetical protein                                             | chromosome-linear | D | -169 | -152 | ATGTCATAAAGCTGTAAA  | 11.73 | -14.12 |
| Atu3699 |             | 779273  | 778764  | hypothetical protein                                             | chromosome-linear | R | -168 | -151 | TTGTCATTTCTCTGTTGC  | 9.18  | -11.37 |
| Atu3700 | tRNA-Gly    | 779527  | 779604  | tRNA-Gly                                                         | chromosome-linear | D | -103 | -86  |                     | 9.18  | -11.37 |
| Atu3702 | tRNA-Met    | 780880  | 780801  | tRNA-Met                                                         | chromosome-linear | D | -29  | -12  | CAGTCACATGACTGTGAC  | 10.75 | -12.99 |
| Atu3704 |             | 783602  | 782412  | hypothetical protein                                             | chromosome-linear | D | -200 | -183 | TTTTCATTCATCTGTCAT  | 12.92 | -15.65 |
| Atu3717 | <i>tolQ</i> | 800084  | 799365  | tolQ Protein                                                     | chromosome-linear | D | -221 | -204 | CTGTAACTCCTTTAAC    | 9.4   | -11.59 |
| Atu3752 |             | 835937  | 835761  | hypothetical protein                                             | chromosome-linear | D | -78  | -61  | ATGTCACATTGCCGTCGT  | 10.36 | -12.57 |
| Atu3753 |             | 836171  | 836374  | hypothetical protein                                             | chromosome-linear | R | -173 | -156 |                     | 10.36 | -12.57 |
| Atu3752 |             | 835937  | 835761  | hypothetical protein                                             | chromosome-linear | D | -67  | -50  | CCGTCGTAACCTGAAAC   | 8.34  | -10.58 |
| Atu3753 |             | 836171  | 836374  | hypothetical protein                                             | chromosome-linear | R | -184 | -167 |                     | 8.34  | -10.58 |
| Atu3767 |             | 850035  | 849127  | GGDEF family protein                                             | chromosome-linear | R | -188 | -171 | CCGTCATATGTCCGTCAT  | 11.17 | -13.47 |
| Atu3768 |             | 850295  | 851740  | homospermidine synthase                                          | chromosome-linear | D | -89  | -72  |                     | 11.17 | -13.47 |
| Atu3778 | <i>galU</i> | 861704  | 860817  | UTP-glucose-1-phosphate uridylyltransferase                      | chromosome-linear | R | -132 | -115 | TTGACATTCTTTTGTAT   | 8.83  | -11.03 |
| Atu3779 | <i>mltB</i> | 861900  | 863120  | murein hydrolase                                                 | chromosome-linear | D | -81  | -64  |                     | 8.83  | -11.03 |
| Atu3781 |             | 864671  | 865345  | two component response regulator                                 | chromosome-linear | R | -194 | -177 | CGGTCCTCAAAGTGTGAT  | 9.68  | -11.87 |
| Atu3818 | <i>rhsA</i> | 914307  | 915806  | ABC transporter, nucleotide binding/ATPase protein [ribose]      | chromosome-linear | D | -35  | -18  | ATGTAACAAAACCTTGAA  | 9.11  | -11.3  |
| Atu3818 | <i>rhsA</i> | 914307  | 915806  | ABC transporter, nucleotide binding/ATPase protein [ribose]      | chromosome-linear | D | -55  | -38  | TTGCCACAATTATTATAT  | 8.09  | -10.35 |
| Atu3824 |             | 921399  | 920416  | hypothetical protein                                             | chromosome-linear | R | -40  | -23  | CCGATATAAACCTGAAAT  | 8.32  | -10.55 |
| Atu3868 |             | 960823  | 961926  | hypothetical protein                                             | chromosome-linear | R | -77  | -60  | CCGTCATCATGCCGAAAT  | 8.27  | -10.51 |
| Atu3882 | tRNA-Val    | 978026  | 977949  | tRNA-Val                                                         | chromosome-linear | D | -78  | -61  | CTCTCAAAAAACCTTCAC  | 9.16  | -11.35 |
| Atu3942 |             | 1047365 | 1047556 | hypothetical protein                                             | chromosome-linear | R | -223 | -206 | CTGTCAATATTCTACAC   | 8.76  | -10.96 |
| Atu3947 | <i>ordL</i> | 1050290 | 1048980 | oxidoreductase                                                   | chromosome-linear | D | -273 | -256 | CTGTAGCCCATACGACAT  | 8.31  | -10.54 |
| Atu3948 |             | 1050590 | 1051735 | hypothetical protein                                             | chromosome-linear | R | -44  | -27  |                     | 8.31  | -10.54 |
| Atu3951 |             | 1055082 | 1054168 | transcriptional regulator, LysR family                           | chromosome-linear | D | -65  | -48  | TTGTAGCCAACCTGTCCT  | 8.75  | -10.96 |
| Atu3952 |             | 1055268 | 1056596 | oxidoreductase                                                   | chromosome-linear | R | -138 | -121 |                     | 8.75  | -10.96 |
| Atu4020 |             | 1133850 | 1132183 | hypothetical protein                                             | chromosome-linear | R | -132 | -115 | CTGTCACGAAAGTGTGAT  | 14.4  | -17.82 |
| Atu4047 | <i>cvgS</i> | 1161200 | 1163668 | two component sensor kinase/response regulator hybrid            | chromosome-linear | R | -156 | -139 | ATGTGCGCATGAGCGTCAT | 8.6   | -10.81 |
| Atu4185 |             | 1309692 | 1309991 | hypothetical protein                                             | chromosome-linear | R | -157 | -140 | CTGTCAATATTCTACAC   | 8.76  | -10.96 |
| Atu4207 |             | 1330789 | 1329641 | transcriptional regulator, ROK family                            | chromosome-linear | R | -44  | -27  | ATGTCATGACTTTTGTAC  | 9.78  | -11.96 |
| Atu4208 |             | 1330879 | 1332252 | ABC transporter, substrate binding protein [sugar]               | chromosome-linear | D | -63  | -46  |                     | 9.78  | -11.96 |
| Atu4214 | <i>cspA</i> | 1336994 | 1336791 | cold shock protein                                               | chromosome-linear | R | -152 | -135 | ATGATAAAGATCCTTCAT  | 8.06  | -10.33 |
| Atu4319 |             | 1447185 | 1448084 | transcriptional regulator, AraC family                           | chromosome-linear | D | -146 | -129 | CTGACAAAAAAGTCAA    | 8.4   | -10.63 |
| Atu4411 |             | 1546895 | 1546032 | transcriptional regulator, LysR family                           | chromosome-linear | R | -177 | -160 | TTGTTAAGAAATCGTCAT  | 10.13 | -12.33 |
| Atu4412 | <i>rzxA</i> | 1547245 | 1553079 | rhizobiocin/RTX toxin                                            | chromosome-linear | D | -190 | -173 |                     | 10.13 | -12.33 |
| Atu4519 | <i>livJ</i> | 1666730 | 1665558 | ABC transporter, substrate binding protein [branched amino acid] | chromosome-linear | D | -86  | -69  | ATTTTCATTTTACTTTGAT | 8.07  | -10.33 |
| Atu4537 |             | 1684383 | 1683715 | ABC transporter, membrane spanning protein [amino acid]          | chromosome-linear | D | -178 | -161 | TTGACACAAAAATGAACT  | 8.07  | -10.33 |
| Atu4567 |             | 1716080 | 1714932 | transcriptional regulator, ROK family                            | chromosome-linear | R | -89  | -72  | CTGTCACAAATATTACAC  | 12.49 | -15.07 |

|         |               |         |         |                                                                   |                   |   |      |      |                     |       |        |
|---------|---------------|---------|---------|-------------------------------------------------------------------|-------------------|---|------|------|---------------------|-------|--------|
| Atu4568 |               | 1716226 | 1717455 | ABC transporter, substrate binding protein                        | chromosome-linear | D | -74  | -57  | CTGTACAAATATTCAC    | 12.49 | -15.07 |
| Atu4567 |               | 1716080 | 1714932 | transcriptional regulator, ROK family                             | chromosome-linear | R | -78  | -61  | TTTTCACTGGACTGTCAC  | 8.57  | -10.79 |
| Atu4568 |               | 1716226 | 1717455 | ABC transporter, substrate binding protein                        | chromosome-linear | D | -85  | -68  |                     | 8.57  | -10.79 |
| Atu4606 |               | 1752664 | 1751054 | hypothetical protein                                              | chromosome-linear | R | -79  | -62  | TATTCATAATTCTGTGCG  | 8.15  | -10.4  |
| Atu4634 |               | 1784966 | 1784322 | hypothetical protein                                              | chromosome-linear | R | -61  | -44  | TTGTCATAAAAACGTGCAT | 18.1  | -26.03 |
| Atu4635 |               | 1785080 | 1785619 | hypothetical protein                                              | chromosome-linear | D | -70  | -53  |                     | 18.1  | -26.03 |
| Atu4803 |               | 1980211 | 1979558 | two component response regulator                                  | chromosome-linear | D | -39  | -22  | TTATCACCGAACTTTCAT  | 9.52  | -11.71 |
| Atu4804 |               | 1980285 | 1980650 | hypothetical protein                                              | chromosome-linear | R | -52  | -35  |                     | 9.52  | -11.71 |
| Atu4841 | <i>deoR</i>   | 2021333 | 2020602 | transcriptional regulator, DeoR family                            | chromosome-linear | D | -93  | -76  | TTGTTATTCTTCTGTCAA  | 9.14  | -11.33 |
| Atu4842 |               | 2021671 | 2022717 | ABC transporter, substrate binding protein [sugar]                | chromosome-linear | R | -262 | -245 |                     | 9.14  | -11.33 |
| Atu4850 |               | 2032246 | 2032770 | hypothetical protein                                              | chromosome-linear | D | -223 | -206 | TTTTAATAAAAAATTAT   | 8.29  | -10.53 |
| Atu5031 |               | 32477   | 31458   | hypothetical protein                                              | pATC58            | R | -271 | -254 | CTGTTATGTCGCTGTTAC  | 9.2   | -11.39 |
| Atu5058 | <i>ugpB</i>   | 56951   | 58210   | ABC transporter, substrate binding protein [glycerol-3-phosphate] | pATC58            | D | -92  | -75  | CTGTCATCAAAACGTCGC  | 12.35 | -14.89 |
| Atu5058 | <i>ugpB</i>   | 56951   | 58210   | ABC transporter, substrate binding protein [glycerol-3-phosphate] | pATC58            | D | -46  | -29  | TTGCTAGACAGCCGTCAT  | 8.62  | -10.84 |
| Atu5117 |               | 124902  | 123961  | hypothetical protein                                              | pATC58            | D | -82  | -65  | TTGCCAGCAAAGTGTGAT  | 8.46  | -10.69 |
| Atu5125 | <i>atrA</i>   | 132964  | 132275  | transcriptional regulator, GntR family                            | pATC58            | R | -54  | -37  | ATGTCACAAAAATGGAAT  | 10.32 | -12.53 |
| Atu5126 | <i>attA1</i>  | 133170  | 134282  | ABC transporter, nucleotide binding/ATPase protein[putrescine]    | pATC58            | D | -169 | -152 |                     | 10.32 | -12.53 |
| Atu5279 |               | 277978  | 278568  | hypothetical protein                                              | pATC58            | D | -100 | -83  | ATGAAATATTTCTTTCAT  | 11.28 | -13.6  |
| Atu5279 |               | 277978  | 278568  | hypothetical protein                                              | pATC58            | R | -100 | -83  | ATGAAAGAAATATTTTCAT | 9.61  | -11.79 |
| Atu5442 |               | 434495  | 436435  | methyl-accepting chemotaxis protein                               | pATC58            | D | -106 | -89  | TTGTTATATAACTTTTAT  | 13.15 | -15.95 |
| Atu5442 |               | 434495  | 436435  | methyl-accepting chemotaxis protein                               | pATC58            | R | -101 | -84  | CTGTAATAAAAAGTTATAT | 11.78 | -14.19 |
| Atu5443 |               | 437082  | 436534  | transcriptional regulator, TetR family                            | pATC58            | D | -42  | -25  | TGTCATATAAAAGTCAA   | 8.13  | -10.39 |
| Atu5444 |               | 437193  | 437981  | short-chain dehydrogenase                                         | pATC58            | R | -86  | -69  |                     | 8.13  | -10.39 |
| Atu5503 |               | 495422  | 493965  | hypothetical protein                                              | pATC58            | R | -284 | -267 | TTGTCAGCGAATTGTCAT  | 11.8  | -14.21 |
| Atu5504 |               | 495746  | 496201  | hypothetical protein                                              | pATC58            | D | -57  | -40  |                     | 11.8  | -14.21 |
| Atu5529 | <i>amiC</i>   | 522874  | 524025  | two component sensor kinase                                       | pATC58            | D | -102 | -85  | CTGACATCATCCTTTCGC  | 9.91  | -12.09 |
| Atu6004 | <i>geneD</i>  | 7578    | 8273    | D protein                                                         | pTiC58            | D | -239 | -222 | ATGTCATTCACATGTCAA  | 10.04 | -12.23 |
| Atu6004 | <i>geneD</i>  | 7578    | 8273    | D protein                                                         | pTiC58            | R | -239 | -222 | TTGACATGTGAATGACAT  | 9.61  | -11.79 |
| Atu6007 | <i>mas1</i>   | 11383   | 10349   | agrociniopine synthesis reductase                                 | pTiC58            | D | -68  | -51  | GTGTTAAATCTCTGTTAT  | 8.05  | -10.32 |
| Atu6012 | <i>ipt</i>    | 19337   | 20059   | isopentenyl transferase                                           | pTiC58            | R | -187 | -170 | TTGAAAGCAATTTGTCAC  | 9.14  | -11.33 |
| Atu6014 | <i>gene6b</i> | 22241   | 21618   | protein 6b                                                        | pTiC58            | D | -135 | -118 | ATGCTATCAATCTGTCGT  | 10.21 | -12.41 |
| Atu6043 | <i>repA</i>   | 52233   | 53450   | replication protein A                                             | pTiC58            | R | -52  | -35  | TTGCCATTTATCCGTGAC  | 8.26  | -10.5  |
| Atu6090 |               | 108998  | 107937  | ATP-dependent DNA ligase                                          | pTiC58            | D | -241 | -224 | ATGTCGTGCAAATGTCAA  | 8.88  | -11.08 |
| Atu6091 |               | 109282  | 110034  | hypothetical protein                                              | pTiC58            | R | -60  | -43  |                     | 8.88  | -11.08 |
| Atu6094 |               | 115339  | 116079  | hypothetical protein                                              | pTiC58            | R | -80  | -63  | CTGCAAGAAAACGTGCGA  | 8.18  | -10.43 |
| Atu6108 | <i>phnA</i>   | 129931  | 129626  | alkylphosphonate uptake protein                                   | pTiC58            | D | -98  | -81  | CTGTCAGAACACCCTGAT  | 8.08  | -10.34 |
| Atu6137 |               | 157232  | 156936  | hypothetical protein                                              | pTiC58            | R | -166 | -149 | CTGTCACCAAACTTTCAT  | 15.93 | -20.54 |
| Atu6138 | <i>accR</i>   | 157464  | 158240  | transcriptional regulator                                         | pTiC58            | D | -83  | -66  |                     | 15.93 | -20.54 |
| Atu6137 |               | 157232  | 156936  | hypothetical protein                                              | pTiC58            | R | -155 | -138 | TTGCAACAAAACGTGCAC  | 12.92 | -15.65 |
| Atu6138 | <i>accR</i>   | 157464  | 158240  | transcriptional regulator                                         | pTiC58            | D | -94  | -77  |                     | 12.92 | -15.65 |
| Atu6178 | <i>virG</i>   | 193546  | 194307  | two component response regulator                                  | pTiC58            | D | -148 | -131 | TTGTCATCAAACGGAGAC  | 8.03  | -10.29 |

<sup>a</sup> Locus tags highlighted yellow are associated with multiple *pho* boxes.

<sup>b</sup> Symbols: D, the same strand; R, the other strand

<sup>c</sup> Coordinates counted from the start codon

<sup>d</sup> Sequences boxed are shared by two genes



<sup>c</sup> Significance measures provided by patser
